# Supplementary material
Source: publisher figshare collection journal article supplement (https://aacr.figshare.com/ndownloader/files/39884263)
Supplement: Supplementary file 1 [file 39884263]

Supplemental Table 3. Environmental factors and colorectal cancer: associations by study design

|  | Cohort Studies | | | |  | Case-Control Studies | | | |
| --- | --- | --- | --- | --- | --- | --- | --- | --- | --- |
| Environmental Variables | ORa | 95% CI | p-value | pv.het |  | ORa | 95% CI | p-value | pv.het |
| BMI (per 10 kg/m2) | 1.27 | 1.15-1.40 | 3.2x10-6 | 1.4x10-3 |  | 1.59 | 1.45-1.74 | 2.8x10-23 | 0.07 |
| Alcohol 1-28g vs. none | 0.92 | 0.83-1.02 | 0.12 | 0.07 |  | 0.88 | 0.78-0.98 | 0.02 | 0.72 |
| Alcohol 28+g vs. none | 1.23 | 1.01-1.50 | 0.03 | 0.08 |  | 1.19 | 1.02-1.40 | 0.03 | 0.88 |
| Smoking (ever vs. never) | 1.19 | 1.08-1.31 | 2.6x10-4 | 0.76 |  | 1.23 | 1.14-1.34 | 6.4x10-7 | 0.35 |
| Smoking (per increase in pack-year grouping)b | 1.08 | 1.05-1.12 | 1.6x10-6 | 0.24 |  | 1.09 | 1.06-1.12 | 1.3x10-9 | 0.16 |
| Aspirin Use (yes vs. no during reference year) | 0.83 | 0.75-0.91 | 1.1x10-4 | 0.07 |  | 0.63 | 0.58-0.69 | 3.6x10-25 | 0.25 |
| PMH Use (yes vs. no at referent time) | 0.71 | 0.63-0.80 | 2.8x10-8 | 0.12 |  | 0.65 | 0.55-0.77 | 2.5x10-7 | 0.31 |
| Dietary calcium (per 500 mg/day)c | 0.80 | 0.74-0.87 | 2.5x10-7 | 0.64 |  | 0.79 | 0.72-0.87 | 3.5x10-7 | 0.05 |
| Dietary fiber (per 10 g/day)c | 0.84 | 0.75-0.94 | 3.5x10-3 | 0.55 |  | 0.81 | 0.71-0.92 | 1.6x10-3 | 0.15 |
| Dietary folate (per 500 mcg/day)c | 0.78 | 0.64-0.94 | 8.0x10-3 | 0.96 |  | 0.44 | 0.29-0.66 | 8.4x10-5 | 0.44 |
| Red meat (per serving/day) | 1.05 | 0.94-1.18 | 0.35 | 0.47 |  | 1.66 | 1.49-1.85 | 1.2x10-19 | 0.02 |
| Red meat (upper vs. lower half) | 1.03 | 0.93-1.13 | 0.58 | 0.98 |  | 1.45 | 1.33-1.57 | 1.8x10-18 | 0.61 |
| Processed meat (servings/day) | 0.96 | 0.73-1.27 | 0.80 | 0.11 |  | 1.70 | 1.46-1.98 | 1.9x10-11 | 0.65 |
| Processed meat (upper vs. lower half) | 1.05 | 0.95-1.16 | 0.33 | 0.18 |  | 1.39 | 1.26-1.54 | 4.3x10-11 | 0.77 |
| Fruit (per 5 servings/day)c | 0.82 | 0.65-1.03 | 0.09 | 0.52 |  | 0.82 | 0.65-1.04 | 0.10 | 0.78 |
| Fruit (upper vs. lower half)c | 0.91 | 0.82-1.01 | 0.07 | 0.27 |  | 0.78 | 0.72-0.85 | 9.5x10-9 | 0.02 |
| Vegetable (per 5 servings/day)c | 0.90 | 0.73-1.12 | 0.34 | 4.0x10-3 |  | 0.74 | 0.59-0.91 | 5.6x10-3 | 0.88 |
| Vegetable (upper vs. lower half)c | 0.89 | 0.80-0.99 | 0.03 | 0.11 |  | 0.84 | 0.77-0.92 | 2.9x10-4 | 0.34 |

ABBREVIATION: PMH (post-menopausal hormone); OR (odds ratio)

a Analyses adjusted for age, sex, and study center

b Pack-year variable categorized into five groups: never smokers and study-specific quartiles of pack-years smoked

c Analyses further adjusted for energy intake where available
